# Supplementary material for: High-throughput phenotyping of plant resistance to aphids by automated video tracking
Source: PubMed Central journal article supplement (PMC4318543; doi:10.1186/s13007-015-0044-z), 2015-01-30
Supplement: 13007_2015_44_MOESM1_ESM.pdf [file 13007_2015_44_MOESM1_ESM.pdf]

**Additional file 1**

**High-throughput phenotyping of plant resistance to aphids by automated video tracking**

**Karen J. Kloth<sup>1,2,3</sup>, Cindy J.M. ten Broeke<sup>1</sup>, Manus P.M. Thoen<sup>1,2,3</sup>, Marianne Hanhart-van den Brink<sup>1</sup>, Gerrie L. Wieggers<sup>1,3</sup>, Olga E. Krips<sup>4</sup>, Lucas P.J.J. Noldus<sup>4</sup>, Marcel Dicke<sup>1</sup> and Maarten A. Jongsma<sup>3</sup>**

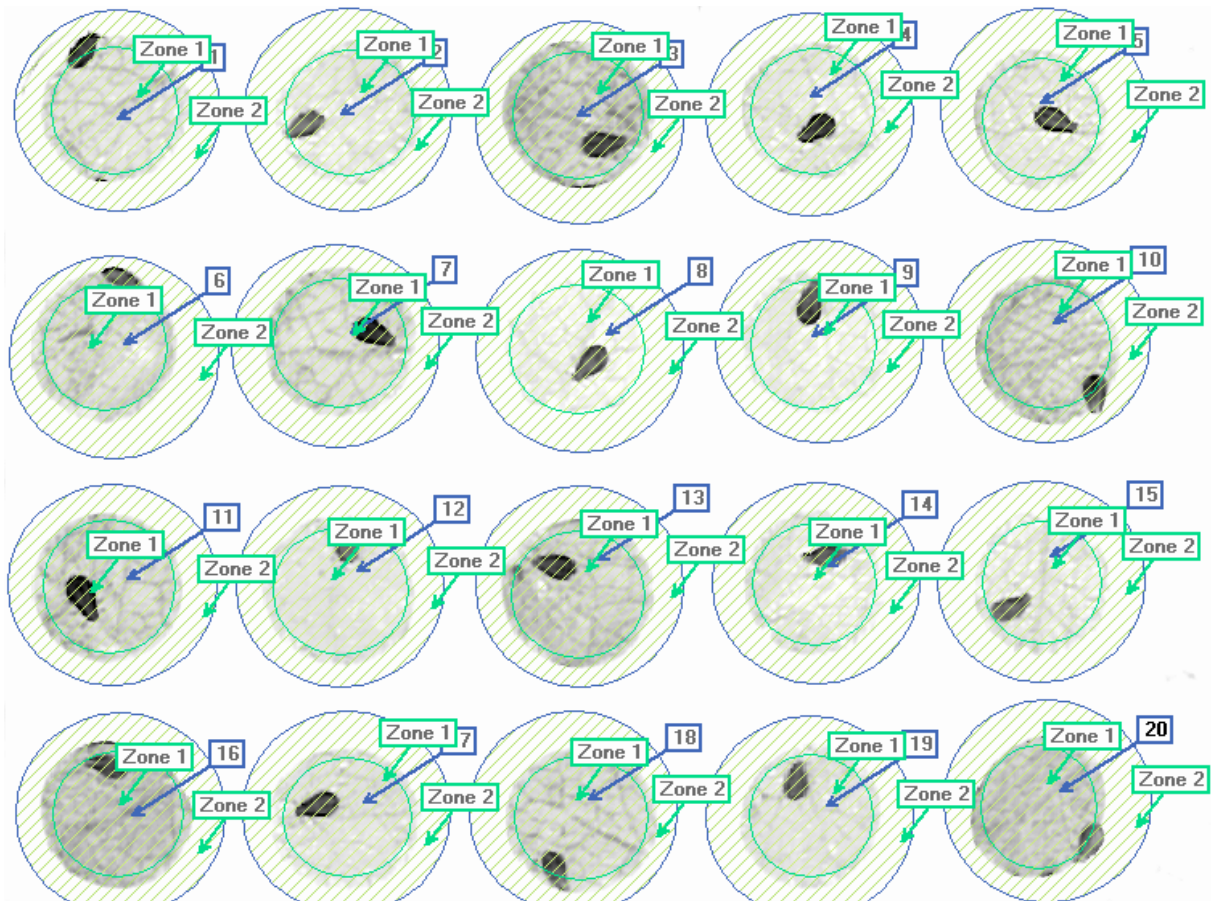

**Figure S1** Arena settings in EthoVision XT.

## Trial and control settings

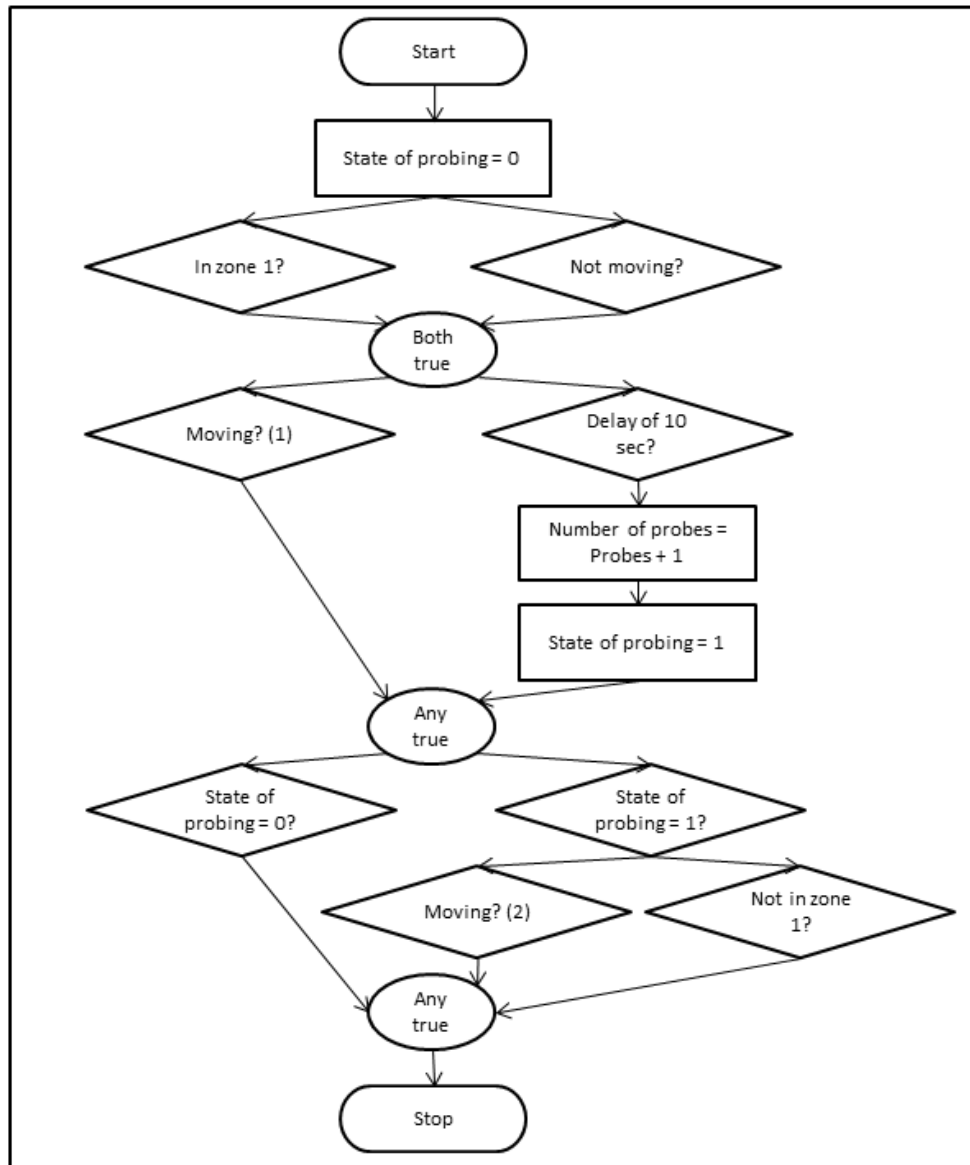

**Figure S2** Trial Control Settings in EthoVision XT for measuring the start time and duration of probes. Zone 1 is the leaf disc. ‘Not moving’ and ‘Moving (1)’ were defined by a start velocity of 0.3 mm/s and a stop velocity of 0.02 mm/s, averaged over 5 samples (0.2 seconds). The condition ‘Moving (2)’ was defined by a start velocity of 0.3 mm/s for *M. persicae*, resp. 0.35 mm/s for *N. ribsinigri*, a stop velocity of 0.1 mm/s, and a minimum duration of 2 seconds. This procedure was repeated indefinitely during data acquisition. Velocities were calculated by taking the average velocity of 5 frames, with a frame rate of 5 frames per second.

**Table S1 Subject detection settings in EthoVision XT for *M. persicae*.**

| <b>Parameters</b>       | <b>Settings</b>                      |
|-------------------------|--------------------------------------|
| Detection method        | Grey scaling, centre point detection |
| Grey scale range        | 6-200                                |
| Subject size            | 85-600 pixels                        |
| Contour erosion (first) | 2 pixels                             |
| Contour dilation        | 2 pixels                             |
| Sample rate             | 5 samples per second                 |
| Pixel smoothing         | Medium                               |
| Track noise reduction   | Off                                  |
| Track smoothing profile | Lowess, 10 samples before and after  |

**Table S2 Absolute differences between EPG recording and automated video tracking.** Response variables are compared between (1) EPGs on intact plants, (2) EPGs on leaf discs, and (3) automated video tracking. Related variables, such as duration of phloem ingestion in EPGs and duration of long probes in video tracking, were tested for absolute differences (Kruskal-Wallis test, pairwise comparison with Mann-Whitney U test, alpha=0.05). On Arabidopsis accessions Co-2 and Sanna-2, probing behaviour of *M. persicae* was recorded, on lettuce cultivars Corbana and Terlana, probing behaviour of *N. ribisnigri*. Within each plant-aphid combination, different colours represent significant differences between the screening methods. Dark colours represent significantly higher values than lighter colours. Blocks with a cross were not significantly different from other blocks within the plant-aphid combination.

|                                                     | Co-2             |               |                 | Sanna-2          |               |                 | Corbana          |                 | Terlana          |                 |
|-----------------------------------------------------|------------------|---------------|-----------------|------------------|---------------|-----------------|------------------|-----------------|------------------|-----------------|
|                                                     | EPG intact plant | EPG leaf disc | Video leaf disc | EPG intact plant | EPG leaf disc | Video leaf disc | EPG intact plant | Video leaf disc | EPG intact plant | Video leaf disc |
| Total duration not penetrating/not probing          | Dark             | Light         | Light           | Light            | Dark          | Light           | Light            | Dark            | Light            | Dark            |
| Total duration phloem feeding /long probes          | Light            | Dark          | Dark            | Light            | Light         | Dark            | Light            | Dark            | Dark             | Light           |
| Total duration sustained phloem feeding/long probes | Light            | Dark          | Dark            | Light            | Light         | Dark            | Light            | Dark            | Dark             | Light           |
| Total duration other penetrations/other probes      | Dark             | Light         | Light           | Dark             | Light         | Light           | Dark             | Light           | Light            | Dark            |
| Number of non-penetrations                          | Dark             | Light         | Light           | Dark             | Light         | Light           | Dark             | Light           | Light            | Dark            |
| Number of phloem feeding events/long probes         | Light            | Dark          | Dark            | Light            | Light         | Dark            | Light            | Dark            | Dark             | Light           |
| Number of short probes                              | Dark             | Light         | Light           | Dark             | Light         | Light           | Dark             | Light           | Light            | Dark            |
| Mean duration phloem feeding events/long probes     | Light            | Dark          | Dark            | Light            | Light         | Dark            | Light            | Dark            | Dark             | Light           |
| Latency to phloem feeding events/long probes        | Dark             | Light         | Light           | Dark             | Light         | Light           | Dark             | Light           | Light            | Dark            |

**Table S3 Video tracking variables used to generate simulations.**

| <b>Plant - aphid</b>          | <b>Duration</b> | <b>Trait (min)</b>              | <b>R</b>     | <b>S</b>    |
|-------------------------------|-----------------|---------------------------------|--------------|-------------|
| Arabidopsis -<br><i>Myzus</i> | 8h              | Mean duration long probes       | 62.8 ± 31.1  | 90.0 ± 40.4 |
|                               |                 | Total duration sustained probes | 276 ± 120    | 353 ± 77.0  |
| Arabidopsis -<br><i>Myzus</i> | 6h              | Mean duration long probes       | 62.6 ± 31.9  | 84.9 ± 32.0 |
|                               |                 | Total duration sustained probes | 208 ± 91.9   | 263 ± 62.5  |
| Lettuce - <i>Nasonovia</i>    | 8h              | Mean duration long probes       | 72.4 ± 43.6  | 99.8 ± 57.3 |
|                               |                 | Total duration sustained probes | 132 ± 127    | 260 ± 133   |
| Lettuce - <i>Nasonovia</i>    | 4h              | Mean duration long probes       | 53.0 ± 29.9  | 87.9 ± 49.4 |
|                               |                 | Total duration sustained probes | 44.1 ± 60.8  | 125 ± 77.2  |
| <b>Plant - aphid</b>          | <b>Duration</b> | <b>Trait (min)</b>              | <b>Col-0</b> |             |
| Arabidopsis -<br><i>Myzus</i> | 8h              | Mean duration long probes       | 55.6 ± 30.9  |             |
|                               |                 | Total duration sustained probes | 170 ± 110    |             |

Mean ± standard deviation, R= resistant plant line (Co-2, resp. Corbana), S= susceptible plant line (Sanna-2, resp. Terlana).
